# Supplementary material for: PKD controls mitotic Golgi complex fragmentation through a Raf–MEK1 pathway
Source: PubMed Central journal article supplement — Mol Biol Cell. 2013 Feb 1;24(3):222–33. doi: 10.1091/mbc.E12-03-0198 (PMC3564543; doi:10.1091/mbc.e12-03-0198), 2013-02-01

**Supplementary Figure 1: Depletion of PKD induces an accumulation of HeLa cells in G2.** HeLa cells were transfected with an ON-Target plus Smartpool Non-targeting control or ON-Target plus Smartpool specific for human PKD1 and PKD2 and cultured for 72h. Cells were fixed and stained with a pHistone 3 (Ser10)-specific antibody and DRAQ5 to visualize the nucleus. pH3-positive cells were classified into the different cell cycle phases based on the specific pH3 localization pattern. n = number of pH3-positive cells analyzed.

**Supplementary Figure 2: Depletion of PKD does not induce activation of caspase-3.** HeLa cells were transfected with siLacZ as a control or PKD1 and 2 specific siRNAs and cultured for 72h. Cells were left untreated or treated with staurosporine at 1  $\mu$ M for 3 hours. Cells were lysed and expression of PKD2 and caspase-3 was analyzed by Western Blot analysis using specific antibodies. Detection of tubulin served as a loading control. Treatment with staurosporine served as a positive control for detection of cleaved caspase-3.

**Supplementary Figure 3: Golgi morphology in control and PKD-depleted interphase and G2 cells.** HeLa cells stably expressing Mannosidase II (red) were transfected with the indicated siRNAs, synchronized at the G1/S border using aphidicolin and released for 10 hours. Cells were fixed and stained with antibodies specific for pH3 (cyan). Nuclei were visualized with DAPI (grey). The images show cells in G2 stage and in interphase. Scale bar 10  $\mu$ m.

# Supplementary Figure 1

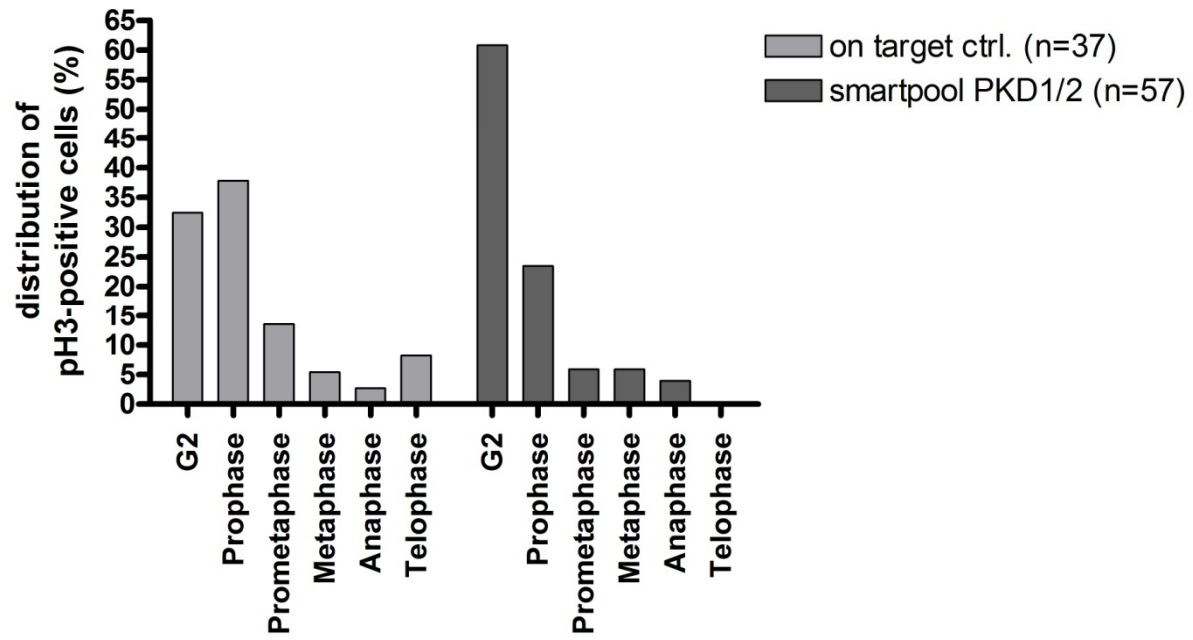

# Supplementary Figure 2

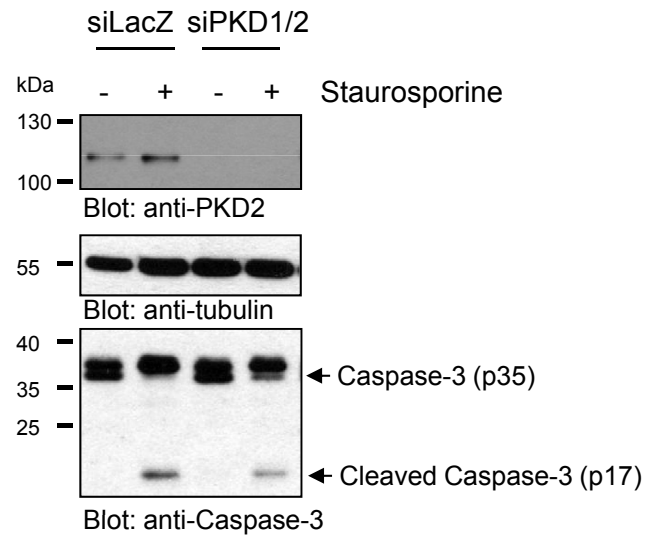

Supplementary Figure 3

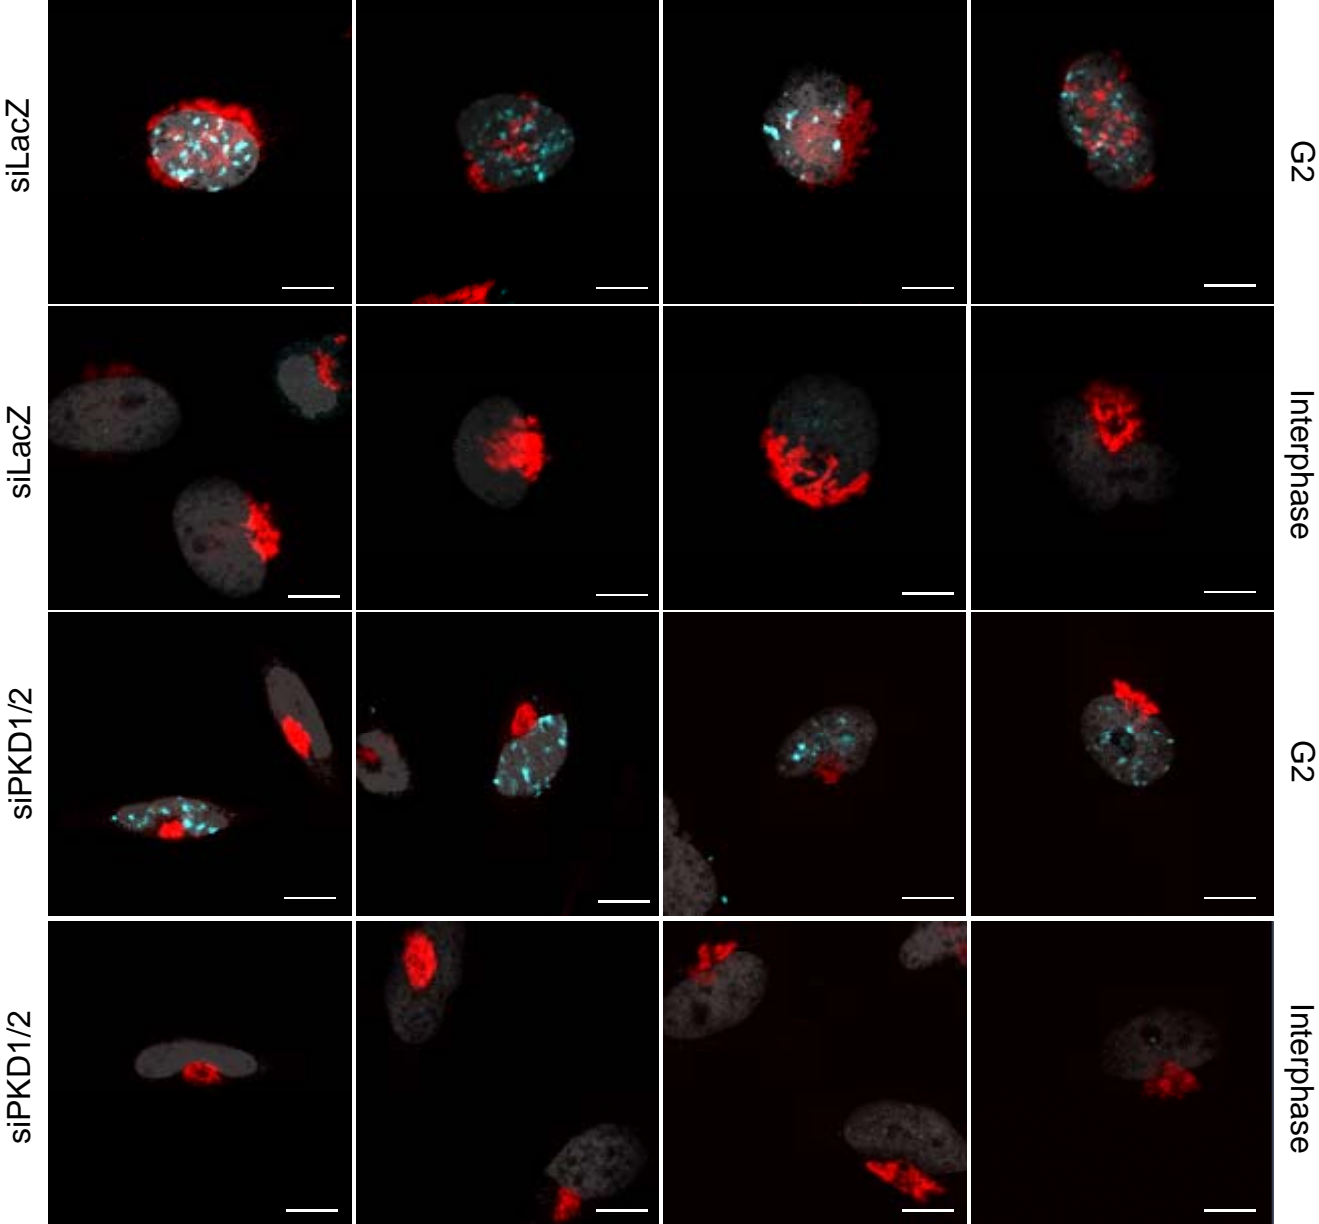

Supplement: supp_E12-03-0198v1_CombinedSupMats.pdf [file supp_E12-03-0198v1_CombinedSupMats.pdf]
